# Supplementary material
Source: PubMed Central journal article supplement (PMC2842040)

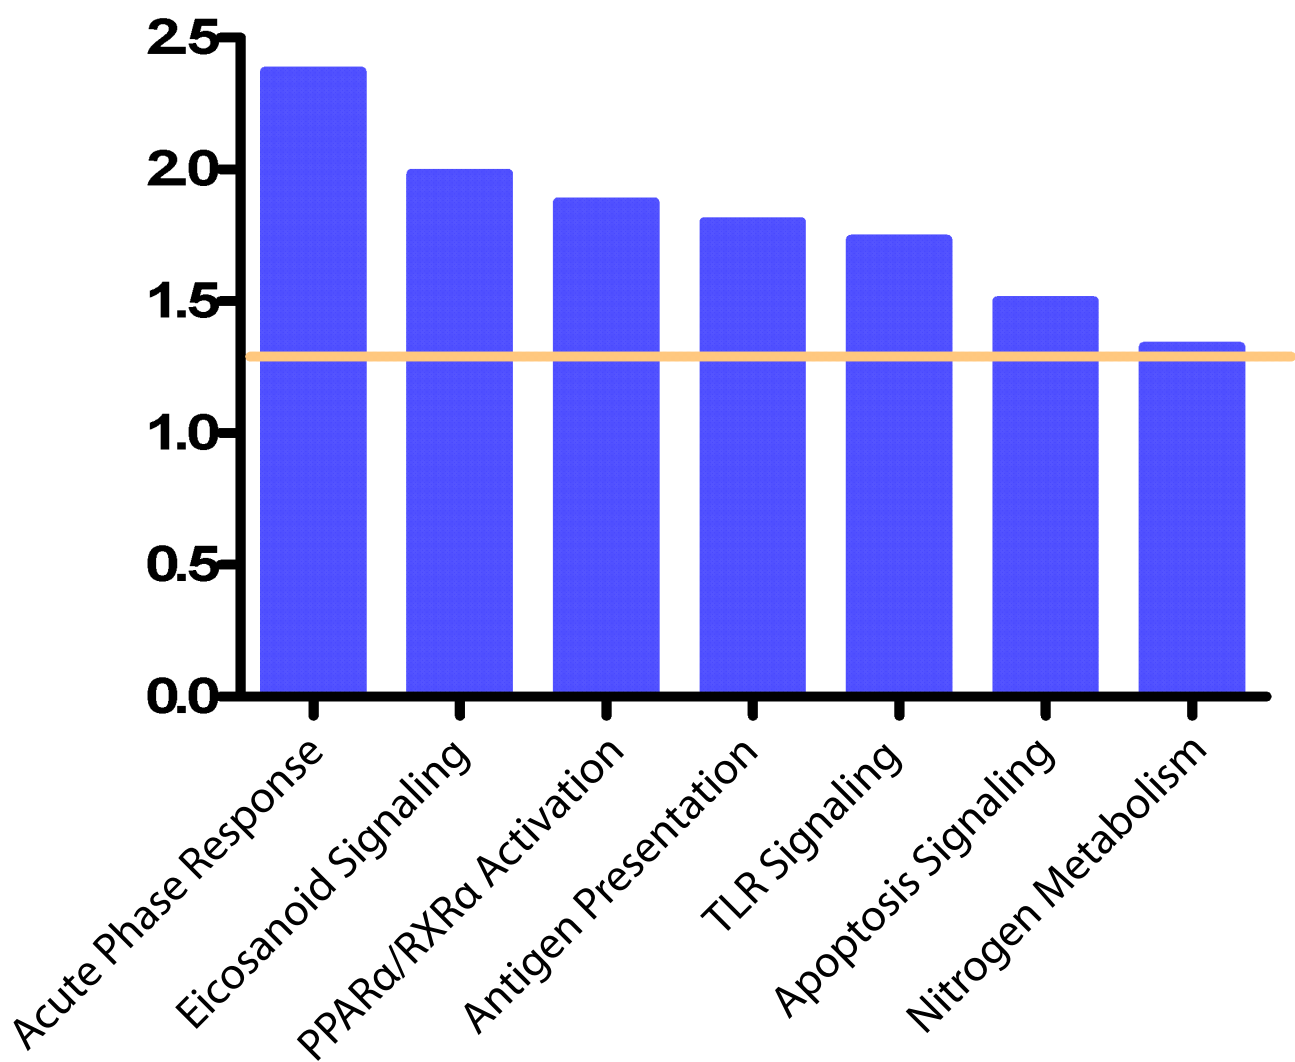

Supplement: 0906384107_sfig01.pdf [file 0906384107_sfig01.pdf]

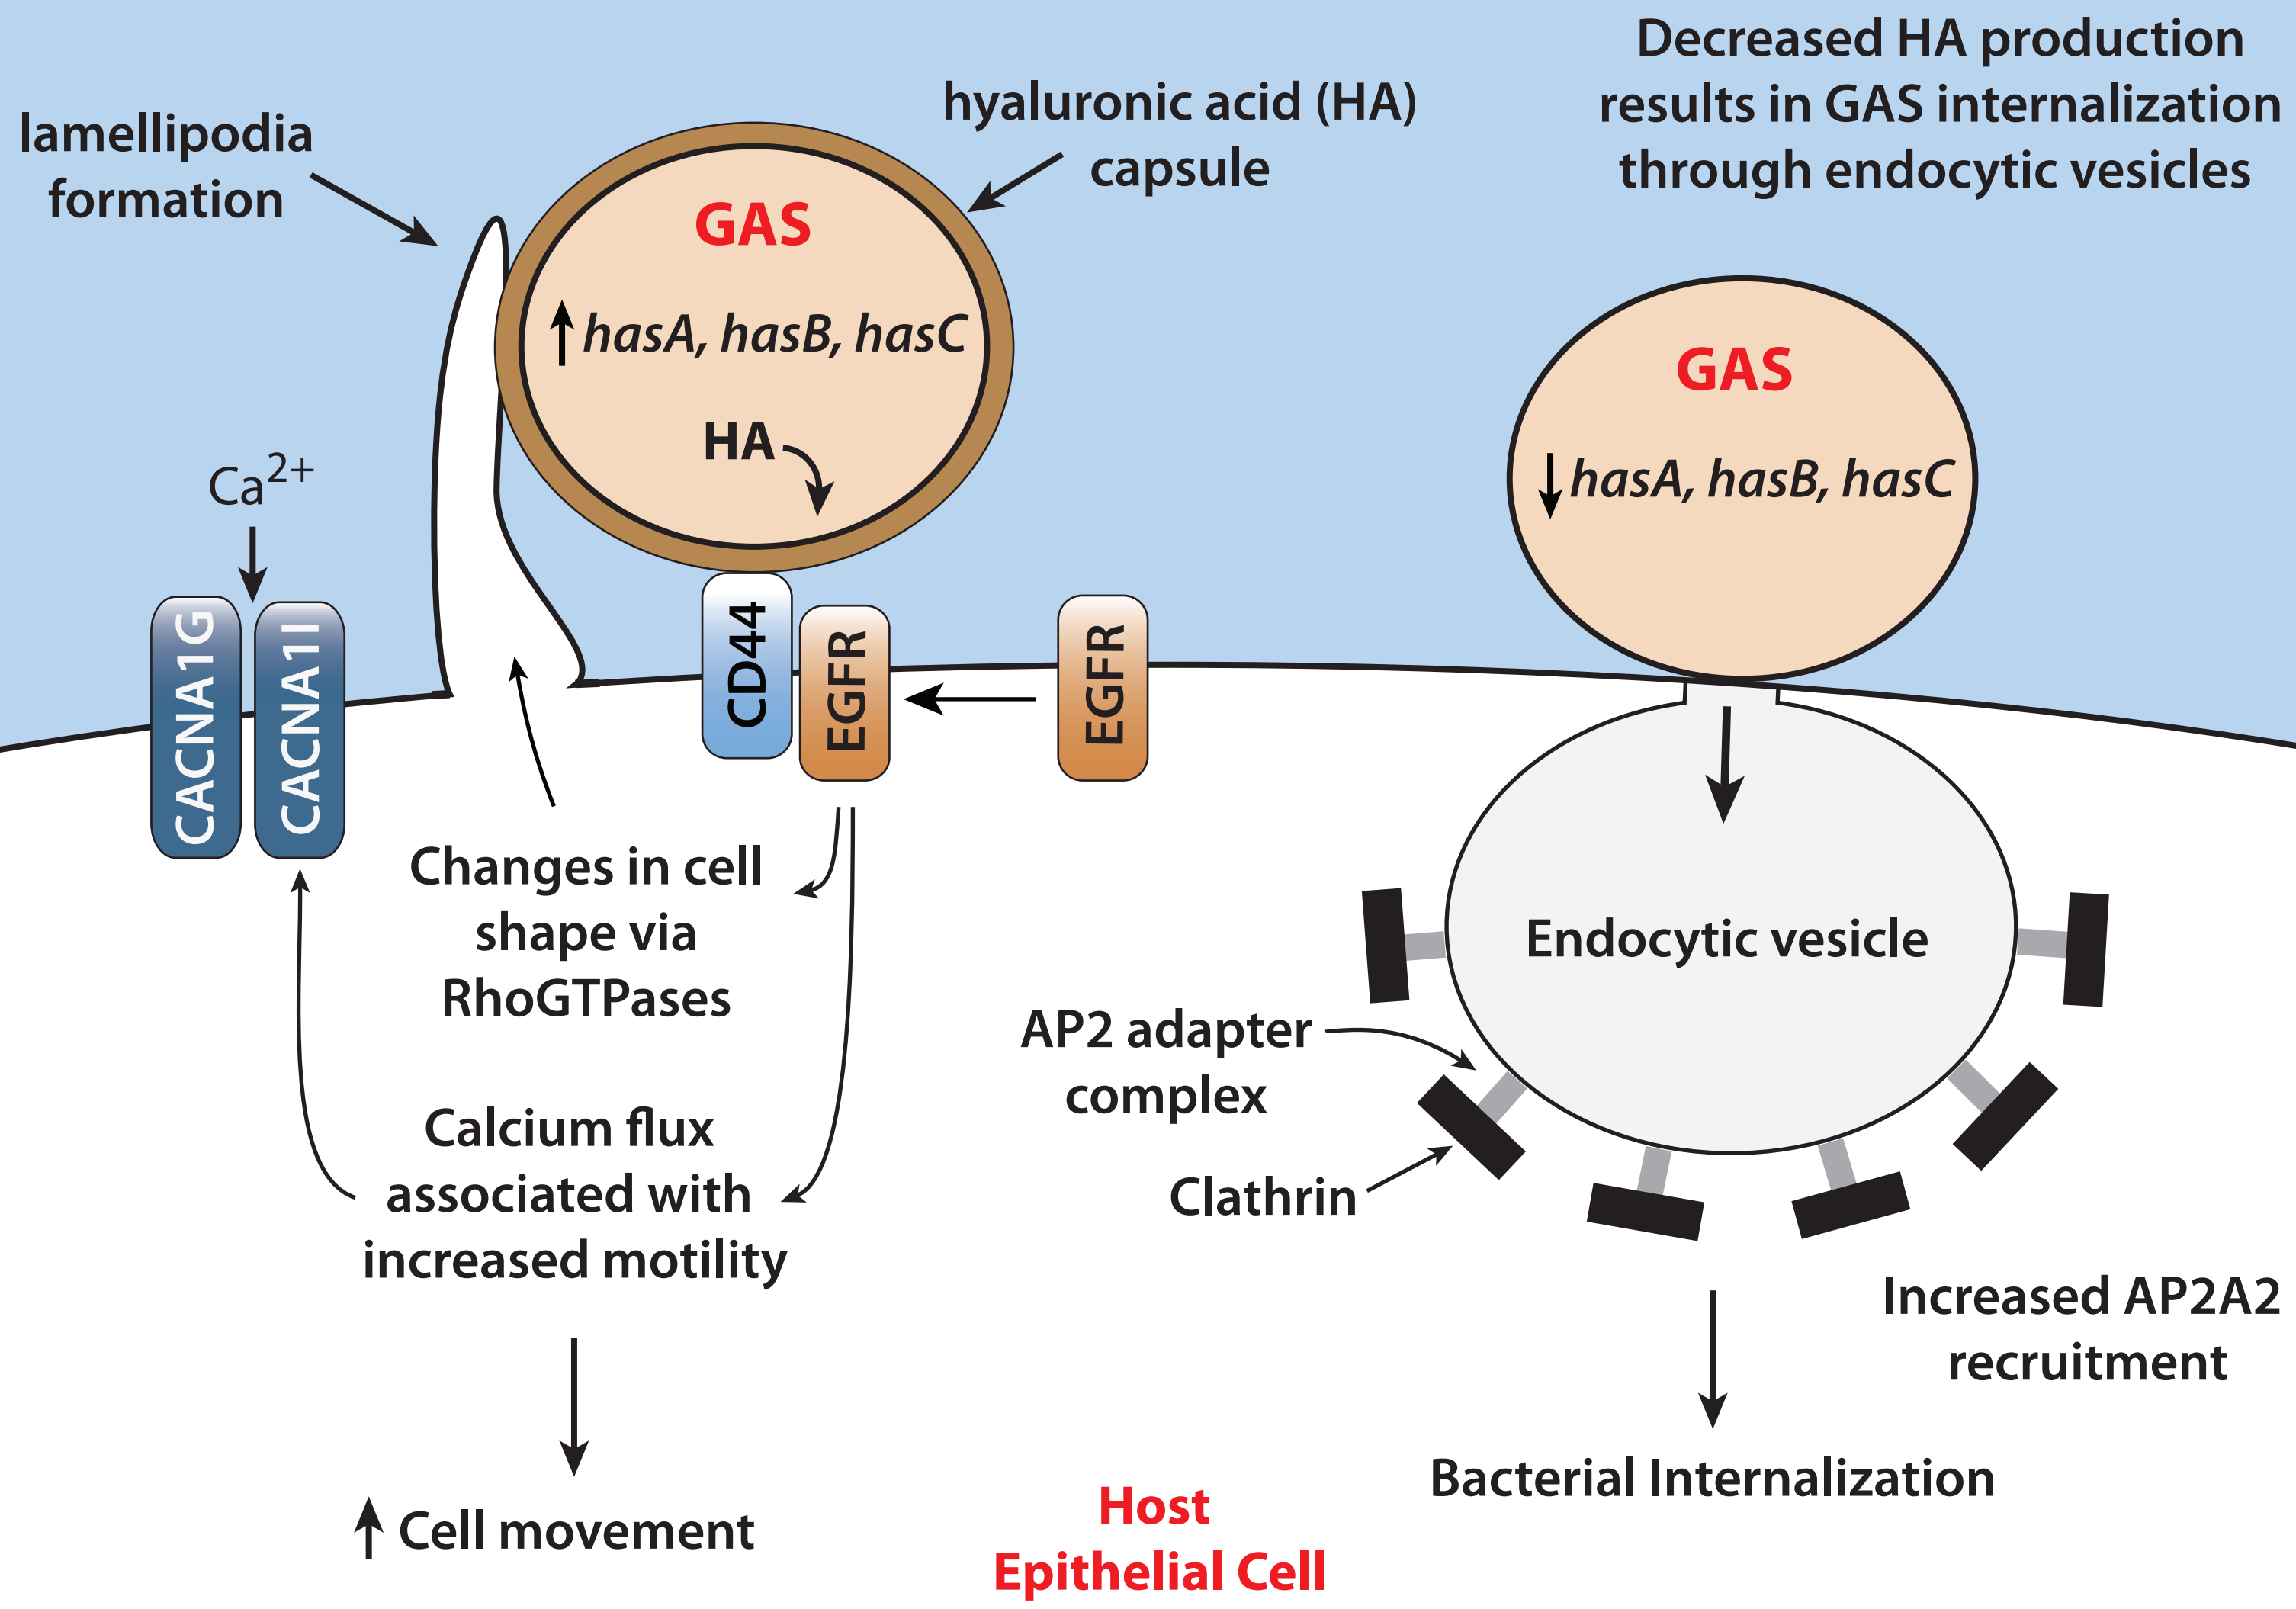

Supplement: 0906384107_sfig04.pdf [file 0906384107_sfig04.pdf]

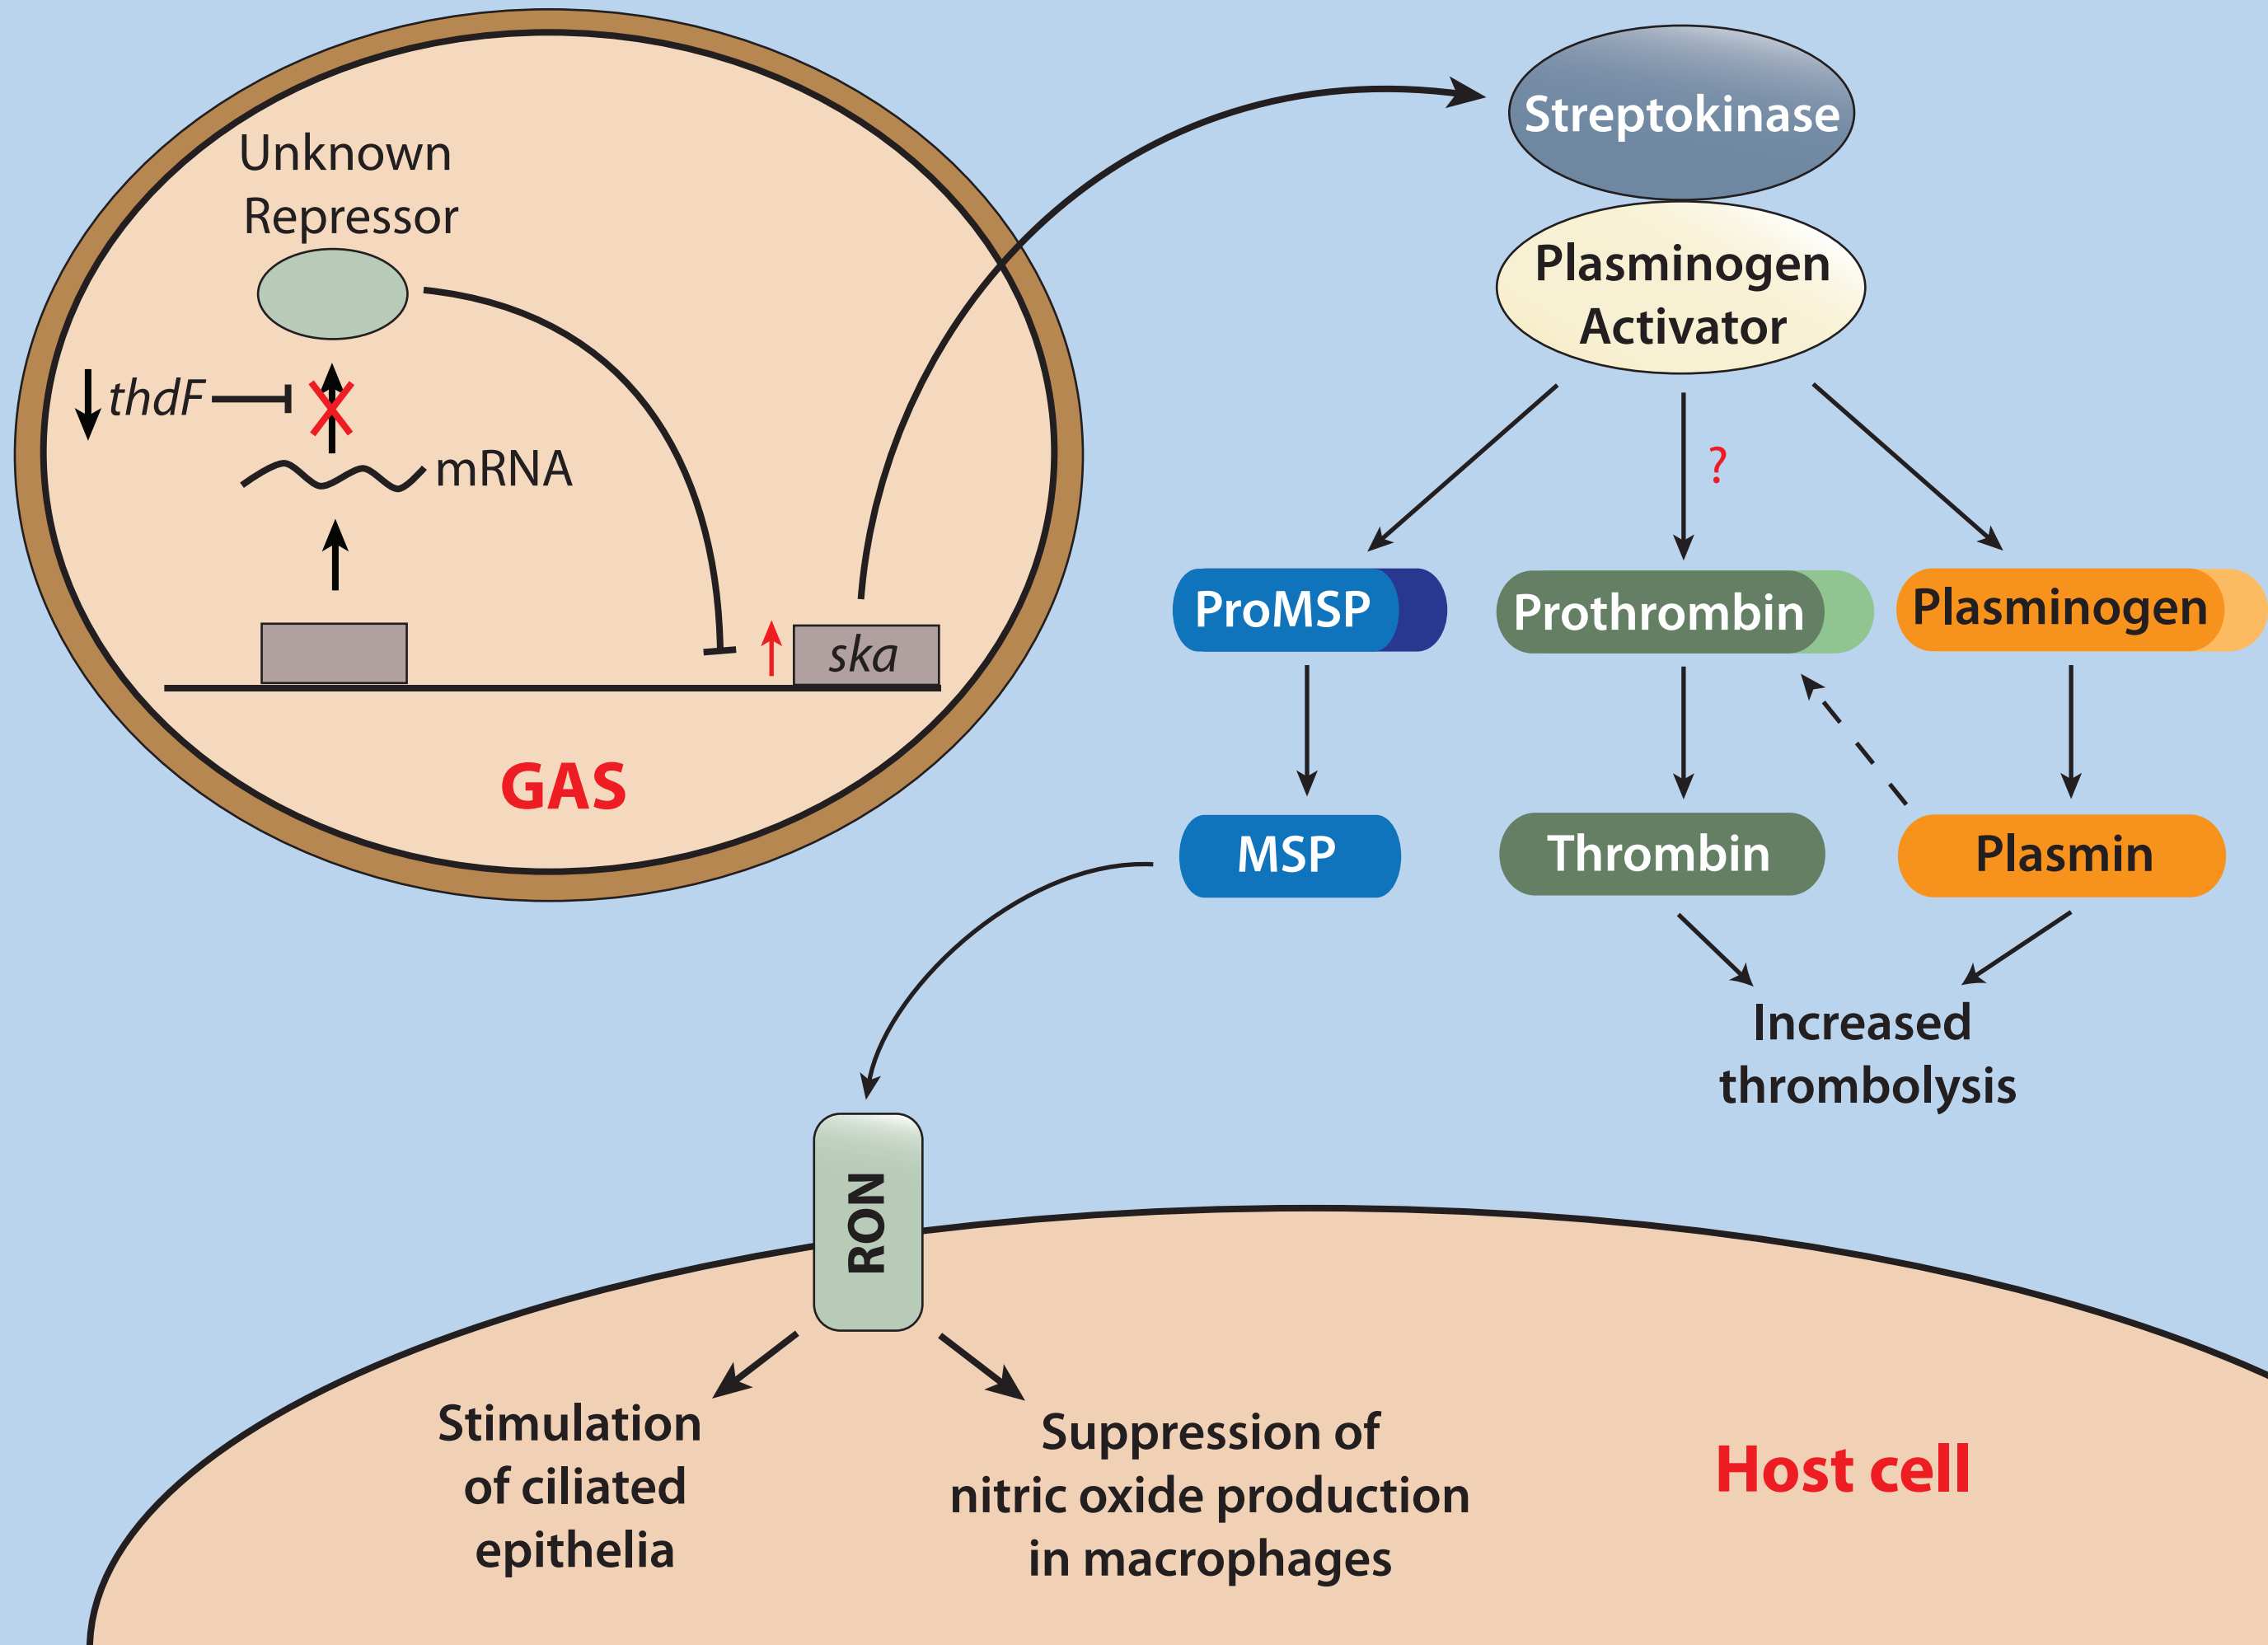

Supplement: 0906384107_sfig05.pdf [file 0906384107_sfig05.pdf]
